# Supplementary material for: Size and structure effects on platinum nanocatalysts: theoretical insights from methanol dehydrogenation
Source: Royal Society of Chemistry journal article supplement (doi:10.1039/d1nr07947f), 2022-01-01
Supplement: d1nr07947f1.pdf [file d1nr07947f1.pdf]

## The Electronic Supplementary Information

### Size and structure effects on platinum nanocatalysts: Theoretical insights from methanol dehydrogenation

Svetlana S. Laletina<sup>\*a,b</sup>, Mikhail Mamatkulov<sup>b</sup>, Aleksey M. Shor<sup>a</sup>, Elena A. Shor<sup>a</sup>, Vasily V. Kaichev<sup>b</sup>  
and Ilya V. Yudanov<sup>\*b,c</sup>

<sup>a</sup>Institute of Chemistry and Chemical Technology (ICCT) of the Siberian Branch of the Russian Academy of Sciences (SB RAS), Federal Research Center "Krasnoyarsk Science Center SB RAS", Krasnoyarsk, 660036, Russia.  
E-mail: [laletina.ss@icct.krasn.ru](mailto:laletina.ss@icct.krasn.ru)

<sup>b</sup>Boreskov Institute of Catalysis, Novosibirsk, 630090, Russia. E-mail: [yudanov@catalysis.ru](mailto:yudanov@catalysis.ru)

<sup>c</sup>Institute of Solid State Chemistry and Mechanochemistry (ISSCM) SB RAS, Novosibirsk, 630128, Russia

#### CONTENT

**Figure S1.** Regular coordination numbers of surface atoms on ideal Pt(111) and model NPs: 12 at bulk, 9 at a surface and (111) nanofacet, 8 at (100) nanofacet, 7 at edges, 6 at corners.

**Table S1.** Adsorption energies,  $E_{\text{ads}}$  (in  $\text{kJ mol}^{-1}$ ), of methanol, formyl and carbon monoxide on 5-layer Pt(111) slab calculated with different k-point meshes.

**Table S2.** CO bond lengths (in Å) in different adsorption complexes at Pt(111), Pt<sub>79</sub> and Pt<sub>201</sub> NPs, the values of correction  $\Delta$  for the CO adsorption energy, CO adsorption energies with and without correction  $\Delta$  (in  $\text{kJ mol}^{-1}$ ).

**Table S3.** Energies ( $\text{kJ mol}^{-1}$ ) of CH<sub>3</sub>OH adsorption at different sites of Pt(111), Pt<sub>79</sub> and Pt<sub>201</sub>.

**Table S4.** Energies ( $\text{kJ mol}^{-1}$ ) of CH<sub>3</sub>O adsorption at different sites of Pt(111), Pt<sub>79</sub> and Pt<sub>201</sub>.

**Table S5.** Energies ( $\text{kJ mol}^{-1}$ ) of CH<sub>2</sub>O adsorption at different sites of Pt(111), Pt<sub>79</sub> and Pt<sub>201</sub>.

**Figure S2.** The formaldehyde structures on Pt(111) and Pt<sub>79</sub>.

**Table S6.** Energies ( $\text{kJ mol}^{-1}$ ) of CHO adsorption at different sites of Pt(111), Pt<sub>79</sub> and Pt<sub>201</sub> NPs.

**Figure S3.** The formyl structures on Pt(111) and Pt<sub>79</sub>.

**Table S7.** Energy ( $\text{kJ mol}^{-1}$ ) of adsorption of H atom at different sites of Pt(111), Pt<sub>79</sub> and Pt<sub>201</sub>.

**Figure S4.** The H adsorption sites on Pt<sub>79</sub>.

**Figure S5.** Intermediates of methanol dehydrogenation calculated at the edge of Pt<sub>79</sub> NP. Adsorption energies (in  $\text{kJ mol}^{-1}$ ) are given nearby the corresponding structures. H atoms are colored white, C atoms – gray, O atoms – red, Pt atoms – cyan.

**Figure S6.** Elementary steps of methanol dehydrogenation at corner site of Pt<sub>79</sub> NP. H atoms are colored white, C atoms – gray, (edge) O atoms – red, Pt atoms – cyan.

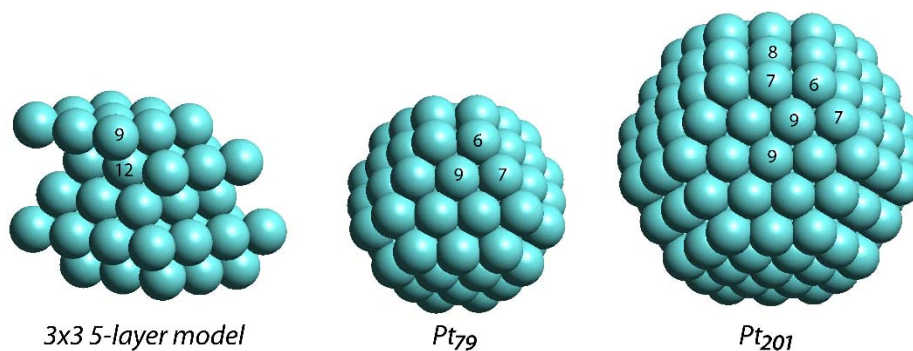

**Figure S1.** Regular coordination numbers of surface atoms on ideal Pt(111) and model NPs: 12 at bulk, 9 at a surface and (111) nanofacet, 8 at (100) nanofacet, 7 at edges, 6 at corners.

**Table S1.** Adsorption energies,  $E_{\text{ads}}$  (in  $\text{kJ mol}^{-1}$ ), of methanol, formyl and carbon monoxide on 5-layer Pt(111) slab calculated with different k-point meshes. On-top binding to the surface Pt atom by the carbon center of the adsorbed species in all cases.

| k-point mesh          | $E_{\text{ads}}(\text{CH}_3\text{OH})$ | $E_{\text{ads}}(\text{CHO})$ | $E_{\text{ads}}(\text{CO})$ |
|-----------------------|----------------------------------------|------------------------------|-----------------------------|
| $4 \times 4 \times 1$ | -34.12                                 | -243.16                      | -164.61                     |
| $5 \times 5 \times 1$ | -33.89                                 | -242.36                      | -164.90                     |
| $7 \times 7 \times 1$ | -33.42                                 | -242.44                      | -164.64                     |

**Table S2.** CO bond lengths (in Å) in different adsorption complexes at Pt(111), Pt<sub>79</sub> and Pt<sub>201</sub> NPs, corrections  $\Delta$  for the CO adsorption energy estimated by formula  $\Delta=460d_{CO}-518$  (in kJ mol<sup>-1</sup>) [V. Sumaria, L. Nguyen, F.F. Tao, P. Sautet, *ACS Catal.*, 2020, **10**, 9533-9544], CO adsorption energies without and with correction  $\Delta$  (in kJ mol<sup>-1</sup>).

| Site                                                                                     | $d_{CO}$ | $\Delta$ | $E_{ads}$ | $E_{ads}+\Delta$ |
|------------------------------------------------------------------------------------------|----------|----------|-----------|------------------|
| free CO                                                                                  | 1.1416   |          |           |                  |
| Pt <sub>79</sub> - <i>t</i>                                                              | 1.1577   | 14.69    | -180      | -166             |
| Pt <sub>79</sub> - <i>t<sub>e</sub></i>                                                  | 1.1600   | 15.735   | -200      | -184             |
| Pt <sub>79</sub> - <i>t<sub>v</sub></i>                                                  | 1.1604   | 15.942   | -211      | -195             |
| Pt <sub>79</sub> - <i>br (t-t)</i>                                                       | 1.1827   | 26.192   | -209      | -182             |
| Pt <sub>79</sub> - <i>br<sub>e</sub> (t-t<sub>e</sub>)</i>                               | 1.1840   | 26.795   | -188      | -161             |
| Pt <sub>79</sub> - <i>br<sub>e</sub><sup>111/111</sup> (t<sub>v</sub>-t<sub>e</sub>)</i> | 1.1836   | 26.625   | -219      | -193             |
| Pt <sub>79</sub> - <i>br<sub>e</sub><sup>111/100</sup> (t<sub>v</sub>-t<sub>e</sub>)</i> | 1.1790   | 24.508   | -186      | -161             |
| Pt <sub>79</sub> - <i>fcc</i> (three-fold hollow)                                        | 1.1945   | 31.629   | -209      | -177             |
| Pt <sub>79</sub> - <i>4-fold</i>                                                         | 1.1966   | 32.591   | -211      | -178             |
| Pt <sub>201</sub> - <i>t<sub>1</sub></i>                                                 | 1.1563   | 14.022   | -148      | -134             |
| Pt <sub>201</sub> - <i>t<sub>2</sub></i>                                                 | 1.1572   | 14.46    | -164      | -150             |
| Pt <sub>201</sub> - <i>t<sub>v</sub></i>                                                 | 1.1603   | 15.873   | -199      | -183             |
| Pt <sub>201</sub> - <i>br<sub>e</sub> (t<sub>v</sub>-t<sub>e</sub>)</i>                  | 1.1828   | 26.252   | -188      | -162             |
| Pt(111)- <i>t</i>                                                                        | 1.1557   | 13.765   | -165      | -151             |
| Pt(111)- <i>br</i>                                                                       | 1.1812   | 25.493   | -173      | -148             |
| Pt(111)- <i>fcc</i>                                                                      | 1.1936   | 31.228   | -176      | -145             |
| Pt(111)- <i>hcp</i>                                                                      | 1.1930   | 31.118   | -174      | -143             |

**Table S3.** Energies ( $\text{kJ mol}^{-1}$ ) of  $\text{CH}_3\text{OH}$  adsorption at different sites of Pt(111), Pt<sub>79</sub> and Pt<sub>201</sub> NPs.

| Site                                     | $E_{\text{ads}}(\text{CH}_3\text{OH})$ |
|------------------------------------------|----------------------------------------|
| Pt <sub>79</sub> - <i>t</i>              | -45                                    |
| Pt <sub>79</sub> - <i>t<sub>e</sub></i>  | -48                                    |
| Pt <sub>79</sub> - <i>t<sub>v</sub></i>  | -56                                    |
| Pt <sub>201</sub> - <i>t<sub>1</sub></i> | -19                                    |
| Pt <sub>201</sub> - <i>t<sub>v</sub></i> | -57                                    |
| Pt(111)- <i>t</i>                        | -34                                    |

**Table S4.** Energies ( $\text{kJ mol}^{-1}$ ) of  $\text{CH}_3\text{O}$  adsorption at different sites of Pt(111), Pt<sub>79</sub> and Pt<sub>201</sub> NPs.

| Site                                                        | $E_{\text{ads}}(\text{CH}_3\text{O})$ |
|-------------------------------------------------------------|---------------------------------------|
| Pt <sub>79</sub> - <i>t</i>                                 | -193                                  |
| Pt <sub>79</sub> - <i>t<sub>e</sub></i>                     | -204                                  |
| Pt <sub>79</sub> - <i>t<sub>v</sub></i>                     | -225                                  |
| Pt <sub>79</sub> - <i>br<sub>e</sub></i> <sup>111/111</sup> | -221                                  |
| Pt <sub>79</sub> - <i>br<sub>e</sub></i> <sup>111/100</sup> | -228                                  |
| Pt <sub>79</sub> - <i>br</i>                                | -174                                  |
| Pt <sub>201</sub> - <i>t<sub>1</sub></i>                    | -162                                  |
| Pt <sub>201</sub> - <i>t<sub>v</sub></i>                    | -217                                  |
| Pt(111)- <i>t</i>                                           | -173                                  |
| Pt(111)- <i>br</i>                                          | -169                                  |
| Pt(111)- <i>fcc</i>                                         | -165                                  |

**Table S5.** Energies ( $\text{kJ mol}^{-1}$ ) of  $\text{CH}_2\text{O}$  adsorption at different sites of Pt(111),  $\text{Pt}_{79}$  and  $\text{Pt}_{201}$  NPs.

| Site                                                                                         | $E_{\text{ads}}(\text{CH}_2\text{O})$ |
|----------------------------------------------------------------------------------------------|---------------------------------------|
| $\text{Pt}_{79}\text{-}t_{\text{v}}(\text{O})\text{-}t_{\text{e}}(\text{C})$                 | -123                                  |
| $\text{Pt}_{79}\text{-}t_{\text{v}}(\text{C})\text{-}t_{\text{e}}(\text{O})$                 | -115                                  |
| $\text{Pt}_{79}\text{-}t_{\text{v}}(\text{C})\text{-}t_{\text{v}}(\text{O})$                 | -105                                  |
| $\text{Pt}_{79}\text{-}t(\text{C})\text{-}t_{\text{e}}(\text{O})$                            | -86                                   |
| $\text{Pt}_{79}\text{-}br_{\text{v}}(t_{\text{v}}t)(\text{O})\text{-}t_{\text{e}}(\text{C})$ | -103                                  |
| $\text{Pt}_{79}\text{-}t(\text{O})\text{-}t(\text{C})$                                       | -76                                   |
| $\text{Pt}_{79}\text{-}t_{\text{v}}(\text{O})\text{-}t(\text{C})$                            | -107                                  |
| $\text{Pt}_{79}\text{-}t_{\text{v}}(\text{C})\text{-}t(\text{O})$                            | -81                                   |
| $\text{Pt}_{201}\text{-}t_1(\text{O})\text{-}t_2(\text{C})$                                  | -48                                   |
| $\text{Pt}_{201}\text{-}t_{\text{v}}(\text{O})\text{-}t_{\text{e}}(\text{C})$                | -108                                  |
| $\text{Pt}(111)\text{-}t(\text{O})\text{-}t(\text{C})$                                       | -56                                   |
| $\text{Pt}(111)\text{-}t(\text{O})$                                                          | -26                                   |

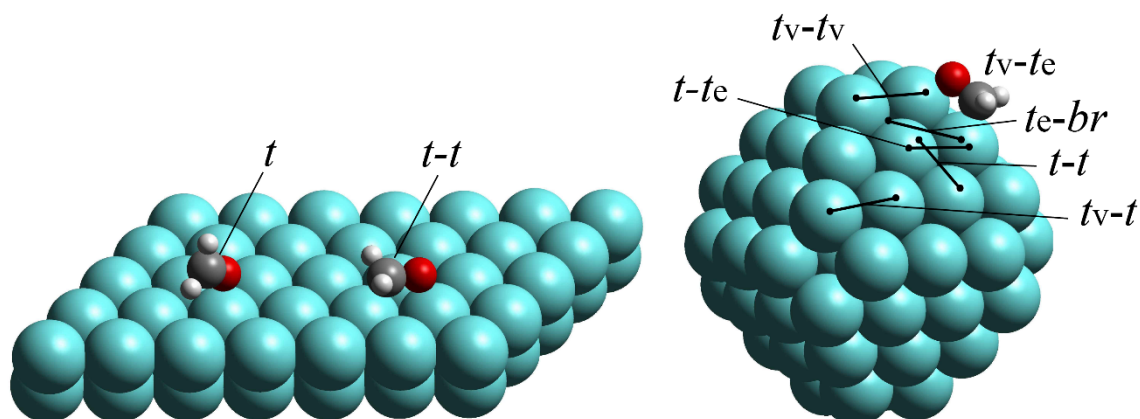

**Figure S2.** The formaldehyde structures on Pt(111) and  $\text{Pt}_{79}$ .

**Table S6.** Energies (kJ mol<sup>-1</sup>) of CHO adsorption at different sites of Pt(111), Pt<sub>79</sub> and Pt<sub>201</sub> NPs.

| Site                                                                                                                        | $E_{\text{ads}}(\text{CHO})$ |
|-----------------------------------------------------------------------------------------------------------------------------|------------------------------|
| Pt <sub>79</sub> - <i>t<sub>v</sub></i> (O)- <i>t<sub>e</sub></i> (C)                                                       | -285                         |
| Pt <sub>79</sub> - <i>t<sub>v</sub></i> (C)- <i>t<sub>e</sub></i> (O)                                                       | -289                         |
| Pt <sub>79</sub> - <i>t<sub>v</sub></i> (C)                                                                                 | -265                         |
| Pt <sub>79</sub> - <i>t</i> (C)                                                                                             | -271                         |
| Pt <sub>79</sub> - <i>t</i> (O)- <i>br</i> (C)                                                                              | -261                         |
| Pt <sub>79</sub> - <i>t</i> (O)- <i>br<sub>e</sub><sup>111/100</sup></i> ( <i>t<sub>v</sub></i> - <i>t<sub>v</sub></i> )(C) | -228                         |
| Pt <sub>79</sub> - <i>t</i> (O)- <i>br<sub>e</sub><sup>111/111</sup></i> ( <i>t<sub>v</sub></i> - <i>t<sub>e</sub></i> )(C) | -262                         |
| Pt <sub>79</sub> - <i>t</i> (O)- <i>br<sub>e</sub></i> ( <i>t<sub>e</sub></i> - <i>t</i> )(C)                               | -235                         |
| Pt <sub>79</sub> - <i>t<sub>e</sub></i> (O)- <i>t</i> (C)                                                                   | -261                         |
| Pt <sub>201</sub> - <i>t<sub>1</sub></i> (C)                                                                                | -251                         |
| Pt <sub>201</sub> - <i>t<sub>2</sub></i> (C)                                                                                | -252                         |
| Pt <sub>201</sub> - <i>t<sub>v</sub></i> (O)- <i>t<sub>e</sub></i> (C)                                                      | -275                         |
| Pt(111)- <i>br</i> (C)- <i>t</i> (O)*                                                                                       | -237                         |
| Pt(111)- <i>t</i> (C)                                                                                                       | -243                         |

\*above fcc-site

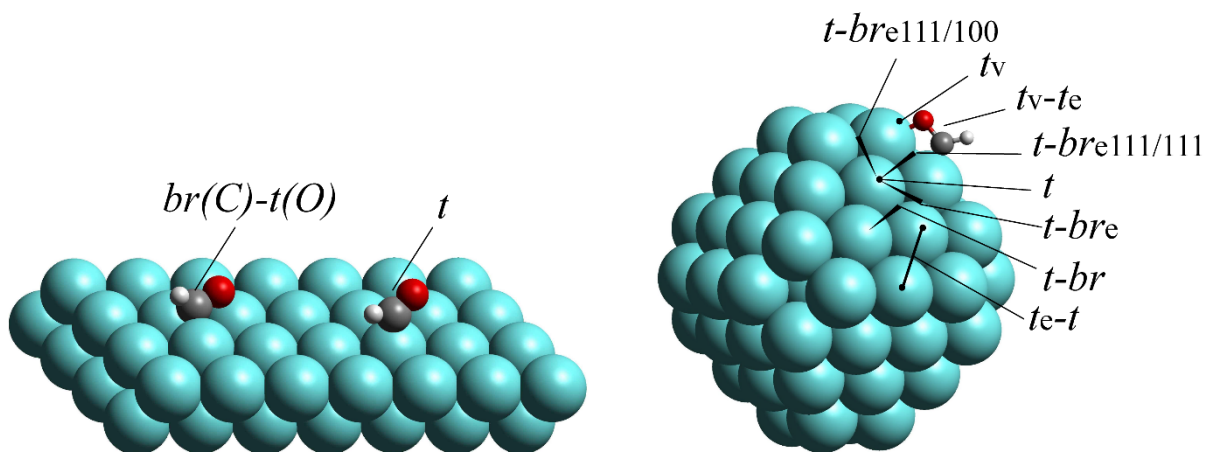

**Figure S3.** The formyl structures on Pt(111) and Pt<sub>79</sub>.

**Table S7.** Energy ( $\text{kJ mol}^{-1}$ ) of adsorption of H atom at different sites of Pt(111), Pt<sub>79</sub> and Pt<sub>201</sub> NPs.

| Site                                                                                               | $E_{\text{ads}}(\text{H})$ |
|----------------------------------------------------------------------------------------------------|----------------------------|
| Pt <sub>79</sub> - <i>t</i>                                                                        | -285                       |
| Pt <sub>79</sub> - <i>t<sub>e</sub></i>                                                            | -266                       |
| Pt <sub>79</sub> - <i>t<sub>v</sub></i>                                                            | -271                       |
| Pt <sub>79</sub> - <i>br<sub>e</sub></i> ( <i>t<sub>br</sub>-t</i> )                               | -267                       |
| Pt <sub>79</sub> - <i>br<sub>e</sub></i> <sup>111/100</sup> ( <i>t<sub>v</sub>-t<sub>v</sub></i> ) | -275                       |
| Pt <sub>79</sub> - <i>br<sub>e</sub></i> <sup>111/111</sup> ( <i>t<sub>v</sub>-t<sub>e</sub></i> ) | -285                       |
| Pt <sub>79</sub> - <i>fcc<sub>1</sub></i> (three-fold hollow)                                      | -267                       |
| Pt <sub>79</sub> - <i>fcc<sub>2</sub></i>                                                          | -267                       |
| Pt <sub>201</sub> - <i>t<sub>1</sub></i>                                                           | -270                       |
| Pt <sub>201</sub> - <i>t<sub>v</sub></i>                                                           | -260                       |
| Pt(111)- <i>t</i>                                                                                  | -267                       |
| Pt(111)- <i>br</i>                                                                                 | -263                       |
| Pt(111)- <i>fcc</i>                                                                                | -267                       |
| Pt(111)- <i>hcp</i>                                                                                | -263                       |

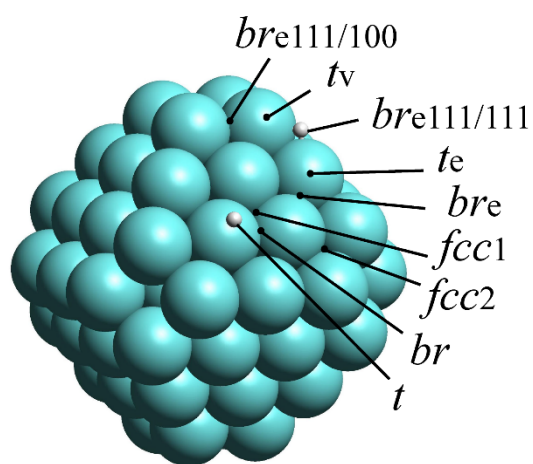

**Figure S4.** The H adsorption sites on Pt<sub>79</sub>.

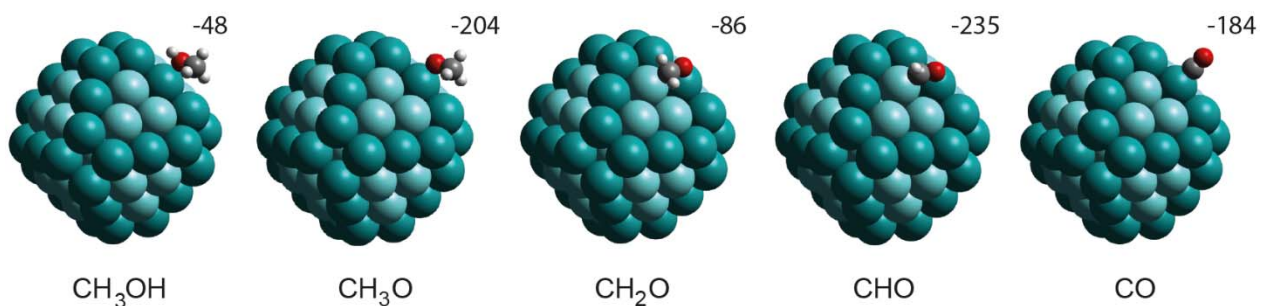

**Figure S5.** Intermediates of methanol dehydrogenation calculated at the edge of Pt<sub>79</sub> NP. Adsorption energies (in kJ mol<sup>-1</sup>) are given nearby the corresponding structures. H atoms are colored white, C atoms – gray, O atoms – red, Pt atoms – cyan.

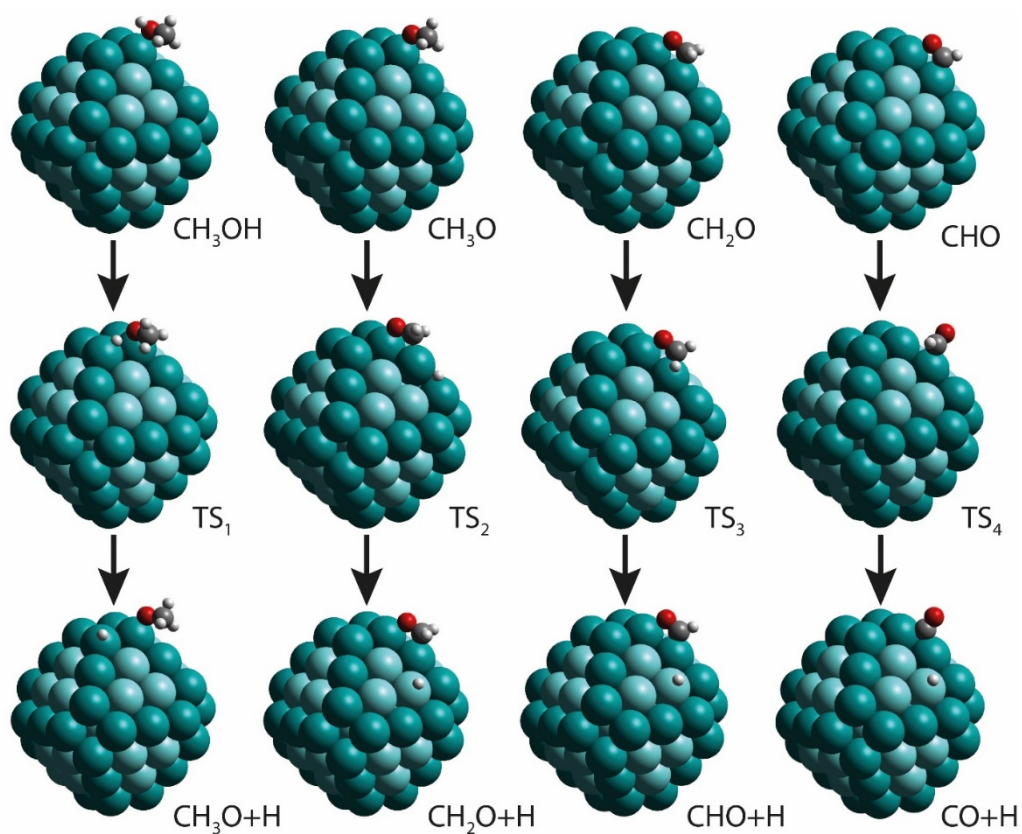

**Figure S6.** Elementary steps of methanol dehydrogenation at corner site of Pt<sub>79</sub> NP. H atoms are colored white, C atoms – gray, (edge) O atoms – red, Pt atoms – cyan.
